# Supplementary material for: Identifying and Managing Suicidality in Myalgic Encephalomyelitis/Chronic Fatigue Syndrome
Source: MDPI journal article supplement (doi:10.3390/healthcare9060629), 2021-05-25
Supplement: s1 [file s1]

## SAFETY PLAN

### Step 1: Warning signs:

1. \_\_\_\_\_
2. \_\_\_\_\_
3. \_\_\_\_\_

### Step 2: Internal coping strategies - Things I can do to take my mind off my problems without contacting another person:

1. \_\_\_\_\_
2. \_\_\_\_\_
3. \_\_\_\_\_

### Step 3: People and social settings that provide distraction:

1. Name \_\_\_\_\_ Phone \_\_\_\_\_
2. Name \_\_\_\_\_ Phone \_\_\_\_\_
3. Place \_\_\_\_\_
4. Place \_\_\_\_\_

### Step 4: People whom I can ask for help:

1. Name \_\_\_\_\_ Phone \_\_\_\_\_
2. Name \_\_\_\_\_ Phone \_\_\_\_\_
3. Name \_\_\_\_\_ Phone \_\_\_\_\_

### Step 5: Professionals or agencies I can contact during a crisis:

1. Clinician Name \_\_\_\_\_ Phone \_\_\_\_\_  
Clinician Pager or Emergency Contact # \_\_\_\_\_
2. Clinician Name \_\_\_\_\_ Phone \_\_\_\_\_  
Clinician Pager or Emergency Contact # \_\_\_\_\_
3. Suicide Prevention Lifeline: 1-800-273-TALK (8255)
4. Local Emergency Service \_\_\_\_\_  
Emergency Services Address \_\_\_\_\_  
Emergency Services Phone \_\_\_\_\_

### Making the environment safe:

1. \_\_\_\_\_
2. \_\_\_\_\_

From Stanley, B. & Brown, G.K. (2011). Safety planning intervention: A brief intervention to mitigate suicide risk. *Cognitive and Behavioral Practice*. 19, 256–264
